# Supplementary material
Source: ML conference proceedings conference paper supplement (https://proceedings.mlr.press/v115/yang20b.html)
Supplement: Supplementary file [file yang20b-supp.pdf]

---

# Supplementary Document for Fast Proximal Gradient Descent for A Class of Non-convex and Non-smooth Sparse Learning Problems

---

**Yingzhen Yang**

School of Computing, Informatics, and Decision Systems Engineering  
Arizona State University  
yingzhen.yang@asu.edu

**Jiahui Yu**

Beckman Institute  
University of Illinois at Urbana-Champaign  
jyu79@illinois.edu

## 1 ALGORITHMS IN THE PAPER

### 1.1 Proximal Gradient Descent

The optimization problem studied in this paper is

$$\min_{\mathbf{x} \in \mathbb{R}^n} F(\mathbf{x}) = g(\mathbf{x}) + h(\mathbf{x}), \quad (1)$$

where  $h(\mathbf{x}) \triangleq \lambda \|\mathbf{x}\|_0$ ,  $\lambda > 0$  is a weighting parameter.

$$\begin{aligned} \mathbf{x}^{(k+1)} &= \text{prox}_{sh}(\mathbf{x}^{(k)} - s\nabla g(\mathbf{x}^{(k)})) \\ &= \arg \min_{\mathbf{v} \in \mathbb{R}^n} \frac{1}{2s} \|\mathbf{v} - (\mathbf{x}^{(k)} - s\nabla g(\mathbf{x}^{(k)}))\|_2^2 + \lambda \|\mathbf{v}\|_0 \\ &= T_{\sqrt{2\lambda s}}(\mathbf{x}^{(k)} - s\nabla g(\mathbf{x}^{(k)})), \end{aligned} \quad (2)$$

---

**Algorithm 1** Proximal Gradient Descent for the  $\ell^0$  Regularization Problem (1)

---

**Input:**

The weighting parameter  $\lambda$ , the initialization  $\mathbf{x}^{(0)}$ .

- 1: **for**  $k = 0, \dots$ , **do**
- 2: Update  $\mathbf{x}^{(k+1)}$  according to (2)
- 3: **end for**

**Output:** Obtain the sparse solution  $\hat{\mathbf{x}}$  upon the termination of the iterations.

---

### 1.2 Nonmonotone Accelerated Proximal Gradient Descent with Support Projection

$$\mathbf{u}^{(k)} = \mathbf{x}^{(k)} + \frac{t_{k-1} - 1}{t_k} (\mathbf{x}^{(k)} - \mathbf{x}^{(k-1)}), \quad (3)$$

$$\mathbf{w}^{(k)} = \mathbf{P}_{\text{supp}(\mathbf{x}^{(k)})}(\mathbf{u}^{(k)}), \quad (4)$$

$$\mathbf{x}^{(k+1)} = \text{prox}_{sh}(\mathbf{w}^{(k)} - s\nabla g(\mathbf{w}^{(k)})), \quad (5)$$

$$t_{k+1} = \frac{\sqrt{1 + 4t_k^2} + 1}{2}, \quad (6)$$

---

**Algorithm 2** Nonmonotone Accelerated Proximal Gradient Descent with Support Projection for the  $\ell^0$  Regularization Problem (1)

---

**Input:**

The weighting parameter  $\lambda$ , the initialization  $\mathbf{x}^{(0)}$ ,  $\mathbf{z}^{(1)} = \mathbf{x}^{(1)} = \mathbf{x}^{(0)}$ ,  $t_0 = 0$ .

- 1: **for**  $k = 1, \dots$ , **do**
- 2: Update  $\mathbf{u}^{(k)}$ ,  $\mathbf{w}^{(k)}$ ,  $\mathbf{x}^{(k+1)}$ ,  $t_{k+1}$  according to (3), (4), (5), (6) respectively.
- 3: **end for**

**Output:** Obtain the sparse solution  $\hat{\mathbf{x}}$  upon the termination of the iterations.

---

### 1.3 Monotone Accelerated Proximal Gradient Descent with Support Projection

$$\mathbf{u}^{(k)} = \mathbf{x}^{(k)} + \frac{t_{k-1}}{t_k} (\mathbf{z}^{(k)} - \mathbf{x}^{(k)}) + \frac{t_{k-1} - 1}{t_k} (\mathbf{x}^{(k)} - \mathbf{x}^{(k-1)}), \quad (7)$$

$$\mathbf{w}^{(k)} = \mathbf{P}_{\text{supp}(\mathbf{z}^{(k)})}(\mathbf{u}^{(k)}), \quad (8)$$

$$\mathbf{z}^{(k+1)} = \text{prox}_{sh}(\mathbf{w}^{(k)} - s\nabla g(\mathbf{w}^{(k)})), \quad (9)$$

$$t_{k+1} = \frac{\sqrt{1 + 4t_k^2} + 1}{2}, \quad (10)$$

$$\mathbf{x}^{(k+1)} = \begin{cases} \mathbf{z}^{(k+1)} & \text{if } F(\mathbf{z}^{(k+1)}) \leq F(\mathbf{x}^{(k)}) \\ \mathbf{x}^{(k)} & \text{otherwise.} \end{cases} \quad (11)$$

## 2 PROOFS

**Lemma 1.** (Support shrinkage for proximal gradient descent in Algorithm 1 and sufficient decrease of the objective function) *If  $s \leq \min\{\frac{2\lambda}{G^2}, \frac{1}{L}\}$ , then*

$$\text{supp}(\mathbf{x}^{(k+1)}) \subseteq \text{supp}(\mathbf{x}^{(k)}), k \geq 0, \quad (12)$$

*namely the support of the sequence  $\{\mathbf{x}^{(k)}\}_k$  shrinks. Moreover, the sequence of the objective  $\{F(\mathbf{x}^{(k)})\}_k$  is*

---

**Algorithm 3** Monotone Accelerated Proximal Gradient Descent with Support Projection for the  $\ell^0$  Regularization Problem (1)

---

**Input:**

The weighting parameter  $\lambda$ , the initialization  $\mathbf{x}^{(0)}$ ,  $\mathbf{z}^{(1)} = \mathbf{x}^{(1)} = \mathbf{x}^{(0)}$ ,  $t_0 = 0$ .

- 1: **for**  $k = 1, \dots$ , **do**
- 2: Update  $\mathbf{u}^{(k)}$ ,  $\mathbf{w}^{(k)}$ ,  $\mathbf{z}^{(k+1)}$ ,  $t_{k+1}$ ,  $\mathbf{x}^{(k+1)}$  according to (7), (8), (9), (10), and (11) respectively.
- 3: **end for**

**Output:** Obtain the sparse solution  $\hat{\mathbf{x}}$  upon the termination of the iterations.

---

nonincreasing, and the following inequality holds for  $k \geq 0$ :

$$F(\mathbf{x}^{(k+1)}) \leq F(\mathbf{x}^{(k)}) - \left(\frac{1}{2s} - \frac{L}{2}\right) \|\mathbf{x}^{(k+1)} - \mathbf{x}^{(k)}\|_2^2. \quad (13)$$

**Proof of Lemma 1.** We prove this Lemma by mathematical induction.

With  $k \geq 0$ , we first show that  $\text{supp}(\mathbf{x}^{(k+1)}) \subseteq \text{supp}(\mathbf{x}^{(k)})$ , i.e. the support of the sequence shrinks. To see this, let  $\tilde{\mathbf{x}}^{(k+1)} = \mathbf{x}^{(k)} - s\nabla g(\mathbf{x}^{(k)})$ .

Since  $\|\mathbf{y} - \mathbf{D}\mathbf{x}^{(k)}\|_2^2 = x_0$ , let  $\mathbf{q}^{(k)} = -s\nabla g(\mathbf{x}^{(k)}) = -2s(\mathbf{D}^\top \mathbf{D}\mathbf{x}^{(k)} - \mathbf{D}^\top \mathbf{y})$ , then

$$|\tilde{\mathbf{x}}_j^{(k+1)}| \leq \|\mathbf{q}^{(k)}\|_\infty \leq sG,$$

where  $j$  is the index for any zero element of  $\mathbf{x}^{(k)}$ , namely  $1 \leq j \leq d, j \notin \text{supp}(\mathbf{x}^{(k)})$ . Now  $|\tilde{\mathbf{x}}_j^{(k+1)}| < \sqrt{2\lambda s}$ , and it follows that  $\mathbf{x}_j^{(k+1)} = 0$  due to the update rule (2). Therefore, the zero elements of  $\mathbf{x}^{(k)}$  remain unchanged in  $\mathbf{x}^{(k+1)}$ , and  $\text{supp}(\mathbf{x}^{(k+1)}) \subseteq \text{supp}(\mathbf{x}^{(k)})$  for  $k \geq 0$ .

Since

$$\mathbf{x}^{(k+1)} = \arg \min_{\mathbf{v} \in \mathbb{R}^d} \frac{1}{2s} \|\mathbf{v} - \tilde{\mathbf{x}}^{(k+1)}\|_2^2 + h(\mathbf{v}),$$

let  $\mathbf{v} = \mathbf{x}^{(k)}$ , we have

$$\begin{aligned} & \frac{1}{2s} \|\mathbf{x}^{(k+1)} - \tilde{\mathbf{x}}^{(k+1)}\|_2^2 + h(\mathbf{x}^{(k+1)}) \\ & \leq \frac{1}{2s} \|s\nabla g(\mathbf{x}^{(k)})\|_2^2 + h(\mathbf{x}^{(k)}), \end{aligned} \quad (14)$$

which is equivalent to

$$\begin{aligned} & \langle \nabla g(\mathbf{x}^{(k)}), \mathbf{x}^{(k+1)} - \mathbf{x}^{(k)} \rangle + \frac{1}{2s} \|\mathbf{x}^{(k+1)} - \mathbf{x}^{(k)}\|_2^2 + h(\mathbf{x}^{(k+1)}) \\ & \leq h(\mathbf{x}^{(k)}). \end{aligned} \quad (15)$$

In addition, since  $L$  is the Lipschitz constant for  $\nabla g$ ,

$$g(\mathbf{x}^{(k+1)}) \leq g(\mathbf{x}^{(k)}) + \langle \nabla g(\mathbf{x}^{(k)}), \mathbf{x}^{(k+1)} - \mathbf{x}^{(k)} \rangle$$

$$+ \frac{L}{2} \|\mathbf{x}^{(k+1)} - \mathbf{x}^{(k)}\|_2^2. \quad (16)$$

Combining (15) and (16), we have

$$\begin{aligned} g(\mathbf{x}^{(k+1)}) + h(\mathbf{x}^{(k+1)}) & \leq g(\mathbf{x}^{(k)}) + h(\mathbf{x}^{(k)}) \\ & - \left(\frac{1}{2s} - \frac{L}{2}\right) \|\mathbf{x}^{(k+1)} - \mathbf{x}^{(k)}\|_2^2. \end{aligned} \quad (17)$$

Now (12) and (13) hold for  $k \geq 0$ . Since the sequence  $\{F(\mathbf{x}^{(k)})\}_k$  is decreasing with lower bound 0, it must converge.  $\square$

**Lemma A.** (Lemma 1 in Laurent and Massart (2000)) Let  $Y_1, Y_2, \dots, Y_D$  be i.i.d. Gaussian random variables with 0 mean and unit variance, and  $a_1, a_2, \dots, a_D$  be  $D$  positive numbers. Define  $Z = \sum_{i=1}^D a_i(Y_i^2 - 1)$  and  $\mathbf{a} = [a_1, a_2, \dots, a_D]^\top$ , then for any  $t > 0$ ,

$$\Pr[Z \geq 2\|\mathbf{a}\|_2\sqrt{t} + 2\|\mathbf{a}\|_\infty t] \leq e^{-t}. \quad (18)$$

**Lemma B.** (Spectrum bound for Gaussian random matrix, Theorem II.13 in Davidson and Szarek (2001)) Suppose  $\mathbf{A} \in \mathbb{R}^{m \times n}$  ( $m \geq n$ ) is a random matrix whose entries are i.i.d. samples generated from the standard Gaussian distribution  $\mathcal{N}(0, \frac{1}{m})$ . Then

$$1 - \sqrt{\frac{n}{m}} \leq \mathbb{E}[\sigma_n(\mathbf{A})] \leq \mathbb{E}[\sigma_1(\mathbf{A})] \leq 1 + \sqrt{\frac{n}{m}}. \quad (19)$$

Also, for any  $t > 0$ ,

$$\begin{aligned} \Pr[\sigma_n(\mathbf{A}) \leq 1 - \sqrt{\frac{n}{m}} - t] & < e^{-\frac{mt^2}{2}}, \\ \Pr[\sigma_1(\mathbf{A}) \geq 1 + \sqrt{\frac{n}{m}} + t] & < e^{-\frac{mt^2}{2}}. \end{aligned} \quad (20)$$

**Theorem 1.** Suppose  $\mathbf{D} \in \mathbb{R}^{d \times n}$  ( $n \geq d$ ) is a random matrix whose elements are i.i.d. samples from the standard Gaussian distribution  $\mathcal{N}(0, 1)$ . Then with probability at least  $1 - e^{-\frac{nt^2}{2}} - ne^{-t}$ ,

$$\frac{2\lambda}{G^2} \geq \frac{1}{L} \quad (21)$$

if

$$n \geq (\sqrt{d} + t + \sqrt{\frac{(d + 2\sqrt{dt} + 2t)(x_0 + \lambda|\mathbf{S}|)}{\lambda}})^2, \quad (22)$$

and  $t$  can be chosen as  $t_0 \log n$  for  $t_0 > 0$  to ensure that (22) holds and (21) holds with high probability.

**Proof of Theorem 1.** According to Lemma B, for any  $t > 0$ , with probability at least  $1 - e^{-\frac{nt^2}{2}}$ ,

$$\sigma_{\max}(\mathbf{D}) > \sqrt{n} - \sqrt{d} - t. \quad (23)$$

Also, by Lemma A, for any  $1 \leq i \leq n$  and  $t > 0$ , with probability at least  $1 - e^{-t}$ ,

$$\|\mathbf{D}^i\|_2 \leq \sqrt{d + 2\sqrt{dt} + 2t}. \quad (24)$$

It then can be verified by union bound that with probability at least  $1 - e^{-\frac{nt^2}{2}} - ne^{-t}$ ,

$$\frac{2D^2(x_0 + \lambda|\mathbf{S}|)}{\lambda} \leq 2\sigma_{\max}^2(\mathbf{D}) \quad (25)$$

if

$$n \geq (\sqrt{d} + t + \sqrt{\frac{(d + 2\sqrt{dt} + 2t)(x_0 + \lambda|\mathbf{S}|)}{\lambda}})^2,$$

according to (23) and (24).  $\square$

**Lemma 2.** (Properties of the subsequences with shrinking support)

- (i) All the elements of each subsequence  $\mathcal{X}_t$  ( $t = 1, \dots, T$ ) in the subsequences with shrinking support have the same support. In addition, for any  $1 \leq t_1 < t_2 \leq T$  and any  $\mathbf{x}^{(k_1)} \in \mathcal{X}_{t_1}$  and  $\mathbf{x}^{(k_2)} \in \mathcal{X}_{t_2}$ , we have  $k_1 < k_2$ ,  $\text{supp}(\mathbf{x}^{(k_2)}) \subseteq \text{supp}(\mathbf{x}^{(k_1)})$ .
- (ii) All the subsequence except for the last one, namely  $\mathcal{X}_t$  ( $t = 1, \dots, T-1$ ), have finite size. Moreover,  $\mathcal{X}_T$  has infinite number of elements, and there exists  $k_0 \geq 0$  such that  $\{\mathbf{x}^{(k)}\}_{k=k_0}^\infty \subseteq \mathcal{X}_T$ .

**Proof of Lemma 2.** (i) For any  $1 \leq t \leq T$ , let  $\mathbf{x}^{(k_1)}, \mathbf{x}^{(k_2)} \in \mathcal{X}_t$  and  $k_1 \neq k_2$ . If  $k_1 < k_2$ , then  $\text{supp}(\mathbf{x}^{(k_2)}) \subseteq \text{supp}(\mathbf{x}^{(k_1)})$  according to the support shrinkage property (12). If  $\text{supp}(\mathbf{x}^{(k_2)}) \subset \text{supp}(\mathbf{x}^{(k_1)})$ , then  $|\text{supp}(\mathbf{x}^{(k_2)})| < |\text{supp}(\mathbf{x}^{(k_1)})|$  which contradicts with the definition of  $\mathcal{X}_t$  whose elements has the same support size. Similar argument holds if  $k_1 > k_2$ . Therefore, all the elements of each subsequence  $\mathcal{X}_t$  ( $t = 1, \dots, T$ ) have the same support.

For any  $1 \leq t_1 < t_2 \leq T$  and any  $\mathbf{x}^{(k_1)} \in \mathcal{X}_{t_1}$  and  $\mathbf{x}^{(k_2)} \in \mathcal{X}_{t_2}$ , note that  $k_1 \neq k_2$  and  $\text{supp}(\mathbf{x}^{(k_2)}) \neq \text{supp}(\mathbf{x}^{(k_1)})$  since  $\mathcal{X}_{t_1}$  and  $\mathcal{X}_{t_2}$  have different support size. Suppose  $k_1 > k_2$ . According to the support shrinkage property (12), we must have  $\text{supp}(\mathbf{x}^{(k_1)}) \subset \text{supp}(\mathbf{x}^{(k_2)})$  and it follows that  $|\text{supp}(\mathbf{x}^{(k_1)})| < |\text{supp}(\mathbf{x}^{(k_2)})|$ , which contradicts with the definition of subsequences with shrinking support. Therefore, we must have  $k_1 < k_2$ , and it follows that  $\text{supp}(\mathbf{x}^{(k_2)}) \subseteq \text{supp}(\mathbf{x}^{(k_1)})$ .

(ii) Suppose  $\mathcal{X}_t$  is an infinite sequence for some  $1 \leq t \leq T-1$ . We can then obtain an infinite sequence from  $\mathcal{X}_t$  in the way described as follows. We first have some  $\mathbf{x}^{(k_0)} \in \mathcal{X}_t$  for some  $k_0 \geq 0$  as  $\mathcal{X}_t$  is nonempty.

Suppose we obtain  $\{\mathbf{x}^{(k'_j)}\}_{j'=0}^j$  in the first  $j \geq 0$  steps with increasing indices  $\{k'_j\}$ , i.e.  $k'_j < k'_{j'}$  if  $j' < j''$ . Since  $\mathcal{X}_t$  is an infinite sequence,  $\mathcal{X}_t \setminus \{\mathbf{x}^{(k'_j)}\}_{j'=0}^j$  is still an infinite sequence. At the  $(j+1)$ -th step, we can find  $\mathbf{x}^{(k_{j+1})} \in \mathcal{X}_t \setminus \{\mathbf{x}^{(k'_j)}\}_{j'=0}^j$  with  $k_{j+1} > k_j$ . Therefore, we obtain an infinite sequence  $\{\mathbf{x}^{(k_j)}\}_{j=0}^\infty \subseteq \mathcal{X}_t$  with increasing increasing indices  $\{k_j\}$ . The fact that  $\{k_j\}$  is increasing, i.e.  $k'_j < k'_{j'}$  if  $j' < j''$ , indicates that  $\lim_{j \rightarrow \infty} k_j = \infty$ . Now we consider an arbitrary element  $\mathbf{x}^{(\tilde{k})} \in \mathcal{X}_{t+1}$ . Because there must exists some  $j \geq 0$  such that  $\tilde{k} \leq k_j$ , according to the support shrinkage property (12), we must have  $\text{supp}(\mathbf{x}^{(k_j)}) \subseteq \text{supp}(\mathbf{x}^{(\tilde{k})})$  which indicates that  $|\text{supp}(\mathbf{x}^{(k_j)})| \leq |\text{supp}(\mathbf{x}^{(\tilde{k})})|$ . On the other hand, as  $\mathbf{x}^{(k_j)} \in \mathcal{X}_t$ , the definition of the subsequences with shrinking support indicates that  $|\text{supp}(\mathbf{x}^{(\tilde{k})})| < |\text{supp}(\mathbf{x}^{(k_j)})|$ . This contradiction shows that each  $\mathcal{X}_t$  must have finite size for  $t = 1, \dots, T-1$ . As  $\{\mathbf{x}^{(k)}\}_{k=0}^\infty$  is an infinite sequence and  $\{\mathcal{X}_t\}_{t=1}^T$  form a disjoint cover of  $\{\mathbf{x}^{(k)}\}_{k=0}^\infty$ ,  $\mathcal{X}_T$  has infinite number of elements.

According to (i),  $\mathcal{X}_T$  is an infinite sequence. By the argument in the proof of (i), there exists an infinite sequence  $\{\mathbf{x}^{(k_j)}\}_{j=0}^\infty \subseteq \mathcal{X}_T$ ,  $\{k_j\}$  is increasing, and  $\lim_{j \rightarrow \infty} k_j = \infty$ . For any  $k > k_0$ , there must exist  $k'_j$  with  $j' \geq 1$  such that  $k'_{j'-1} \leq k \leq k'_{j'}$ . According to the support shrinkage property (12),

$$\text{supp}(\mathbf{x}^{(k'_{j'})}) = \mathbf{S}^* \subseteq \text{supp}(\mathbf{x}^{(k)}) \subseteq \text{supp}(\mathbf{x}^{(k'_{j'-1})}) = \mathbf{S}^*$$

Therefore,  $|\text{supp}(\mathbf{x}^{(k)})| = |\mathbf{S}^*|$  and it follows that  $\mathbf{x}^{(k)} \in \mathcal{X}_T$  for any  $k \geq k_0$ , namely  $\{\mathbf{x}^{(k)}\}_{k=k_0}^\infty \subseteq \mathcal{X}_T$ .  $\square$

Denote by  $\mathbf{S}^*$  the support of any element in  $\mathcal{X}_T$ . If  $\{\mathbf{x}^{(k)}\}_{k=0}^\infty$  generated by Algorithm 1 has a limit point  $\mathbf{x}^*$ , then the following theorem shows that the sequence  $\{\mathbf{x}^{(k)}\}_{k=0}^\infty$  converges to  $\mathbf{x}^*$ , and  $\mathbf{x}^*$  is a critical point of  $F(\cdot)$  whose support is  $\mathbf{S}^*$ .

**Theorem 2.** (Convergence of PGD for the  $\ell^0$  regularization problem (1)) Suppose  $s \leq \min\{\frac{2\lambda}{C^2}, \frac{1}{L}\}$ , and  $\mathbf{x}^*$  is a limit point of  $\{\mathbf{x}^{(k)}\}_{k=0}^\infty$ . Then the sequence  $\{\mathbf{x}^{(k)}\}_{k=0}^\infty$  generated by Algorithm 1 converges to  $\mathbf{x}^*$ , and  $\mathbf{x}^*$  is a critical point of  $F(\cdot)$ . Moreover, there exists  $k_0 \geq 0$  such that for all  $m \geq k_0$ ,

$$F(\mathbf{x}^{(m+1)}) - F(\mathbf{x}^*) \leq \frac{1}{2s(m - k_0 + 1)} \|\mathbf{x}^{(k_0)} - \mathbf{x}^*\|_2^2. \quad (26)$$

**Proof of Theorem 2.** Because  $\mathbf{x}^*$  is a limit point of  $\{\mathbf{x}^{(k)}\}_{k=0}^\infty$ , there must have a subsequence  $\{\mathbf{x}^{(k_j)}\}$  such that  $\mathbf{x}^{(k_j)} \rightarrow \mathbf{x}^*$  as  $j \rightarrow \infty$ . In addition,  $\mathbf{x}^*$  is a limit point of  $\{\mathbf{x}^{(k)}\}_{k=k_0}^\infty$  and  $F(\mathbf{x}^*) = \inf_{k \geq 0} \{F(\mathbf{x}^{(k)})\}$ . We now show that  $\text{supp}(\mathbf{x}^*) = \mathbf{S}^*$ . To see this, we

first have  $\text{supp}(\mathbf{x}^*) \subseteq \mathbf{S}^*$ . Otherwise, pick arbitrary  $i \in \text{supp}(\mathbf{x}^*) \setminus \mathbf{S}^*$ , then  $\|\mathbf{x}^{(k_j)} - \mathbf{x}^*\|_2 \geq |\mathbf{x}_i^*|$ , contradicting with fact that  $\mathbf{x}^{(k_j)} \rightarrow \mathbf{x}^*$ .

Moreover, suppose  $\text{supp}(\mathbf{x}^*) \subset \mathbf{S}^*$ , we then pick arbitrary  $i \in \mathbf{S}^* \setminus \text{supp}(\mathbf{x}^*)$ . It can be shown that  $\mathbf{x}_i^{(k_j)} \rightarrow 0$ . Otherwise, there exists  $\varepsilon > 0$ , for any  $j$ , there exists  $j' \geq j$  such that  $|\mathbf{x}_i^{(k_{j'})}| \geq \varepsilon$ . It follows that  $\|\mathbf{x}^{(k_{j'})} - \mathbf{x}^*\|_2 \geq |\mathbf{x}_i^{(k_{j'})}| \geq \varepsilon$ , contradicting with the fact that  $\mathbf{x}^{(k_j)} \rightarrow \mathbf{x}^*$ .

Let  $\varepsilon > 0$  be a sufficiently small positive number such that  $sG + \varepsilon < \sqrt{2\lambda s}$ . Since  $\mathbf{x}_i^{(k_j)} \rightarrow 0$ , there exists sufficiently large  $j$  such that  $|\mathbf{x}_i^{(k_j)}| < \varepsilon$ . Let  $\tilde{\mathbf{x}}^{(k_j+1)} = \mathbf{x}^{(k_j)} - s\nabla g(\mathbf{x}^{(k_j)})$ , then

$$\begin{aligned} |\tilde{\mathbf{x}}_i^{(k_j+1)}| &\leq |\mathbf{x}_i^{(k_j)}| + sG \\ &< \varepsilon + sG \leq \sqrt{2\lambda s}. \end{aligned}$$

It follows that  $\mathbf{x}_i^{(k_j+1)} = 0$  according to the update rule (2), so that  $\text{supp}(\mathbf{x}^{(k_j+1)}) \subseteq \text{supp}(\mathbf{x}^{(k_j)}) \setminus \{i\}$ . On the other hand, note that  $\mathbf{x}^{(k_j+1)} \in \mathcal{X}_i$ , so we have  $\text{supp}(\mathbf{x}^{(k_j+1)}) = \text{supp}(\mathbf{x}^{(k_j)})$  by Lemma 2. This contradiction shows that  $\text{supp}(\mathbf{x}^*) \subset \mathbf{S}^*$  cannot hold. Therefore,  $\text{supp}(\mathbf{x}^*) = \mathbf{S}^*$ .

According to Lemma 2, there exists  $k_0 \geq 0$  such that  $\{\mathbf{x}^{(k)}\}_{k=k_0}^\infty \subseteq \mathcal{X}_T$ . We will prove that  $\{\mathbf{x}^{(k)}\}_{k=k_0}^\infty$  converges to  $\mathbf{x}^*$  in the sequel.

It follows that for any  $\mathbf{u}, \mathbf{v}$ ,

$$g(\mathbf{v}) \leq g(\mathbf{u}) + \langle \nabla g(\mathbf{u}), \mathbf{v} - \mathbf{u} \rangle + \frac{L}{2} \|\mathbf{v} - \mathbf{u}\|_2^2. \quad (27)$$

Due to the convexity of  $g$ , for any  $\mathbf{v} \in \mathbb{R}^n$  and  $k \geq 0$ ,

$$g(\mathbf{x}^{(k+1)}) + \langle \nabla g(\mathbf{x}^{(k+1)}), \mathbf{v} - \mathbf{x}^{(k+1)} \rangle \leq g(\mathbf{v}). \quad (28)$$

In addition, we have

$$\begin{aligned} \mathbf{x}^{(k+1)} &= \text{prox}_{s_h}(\mathbf{x}^{(k)} - s\nabla g(\mathbf{x}^{(k)})) \\ &= \arg \min_{\mathbf{v} \in \mathbb{R}^d} \frac{1}{2s} \|\mathbf{v} - (\mathbf{x}^{(k)} - s\nabla g(\mathbf{x}^{(k)}))\|_2^2 + h(\mathbf{v}). \end{aligned} \quad (29)$$

It follows from (29) that

$$\begin{aligned} \frac{1}{s}(\mathbf{x}^{(k+1)} - (\mathbf{x}^{(k)} - s\nabla g(\mathbf{x}^{(k)}))) + \partial h(\mathbf{x}^{(k+1)}) &= 0 \\ \Rightarrow -\nabla g(\mathbf{x}^{(k)}) - \frac{1}{s}(\mathbf{x}^{(k+1)} - \mathbf{x}^{(k)}) &\in \partial h(\mathbf{x}^{(k+1)}). \end{aligned} \quad (30)$$

Since  $\mathbf{x}^{(k+1)} = T_{\sqrt{2\lambda s}}(\mathbf{x}^{(k)} - s\nabla g(\mathbf{x}^{(k)}))$ , we have  $[\partial h(\mathbf{x}^{(k+1)})]_j = 0$  for any  $j \in \text{supp}(\mathbf{x}^{(k+1)})$ . It follows that for any vector  $\mathbf{v} \in \mathbb{R}^d$  such that  $\text{supp}(\mathbf{v}) = \text{supp}(\mathbf{x}^{(k+1)})$ , the following equality holds:

$$h(\mathbf{v}) = h(\mathbf{x}^{(k+1)}) + \langle -\nabla g(\mathbf{x}^{(k)}) - \frac{1}{s}(\mathbf{x}^{(k+1)} - \mathbf{x}^{(k)}), \mathbf{v} - \mathbf{x}^{(k+1)} \rangle.$$

$$\mathbf{v} - \mathbf{x}^{(k+1)}. \quad (31)$$

Based on (27) and (28), for any  $k \geq k_0$  and arbitrary  $\mathbf{v} \in \mathbb{R}^d$  we have

$$\begin{aligned} F(\mathbf{x}^{(k+1)}) &= g(\mathbf{x}^{(k+1)}) + h(\mathbf{x}^{(k+1)}) \\ &\leq g(\mathbf{x}^{(k)}) + \langle \nabla g(\mathbf{x}^{(k)}), \mathbf{x}^{(k+1)} - \mathbf{x}^{(k)} \rangle \\ &\quad + \frac{L}{2} \|\mathbf{x}^{(k+1)} - \mathbf{x}^{(k)}\|_2^2 + h(\mathbf{x}^{(k+1)}) \\ &\leq g(\mathbf{v}) + \langle \nabla g(\mathbf{x}^{(k)}), \mathbf{x}^{(k)} - \mathbf{v} \rangle + \langle \nabla g(\mathbf{x}^{(k)}), \mathbf{x}^{(k+1)} - \mathbf{x}^{(k)} \rangle \\ &\quad + \frac{L}{2} \|\mathbf{z}^{(k+1)} - \mathbf{w}^{(k)}\|_2^2 + h(\mathbf{z}^{(k+1)}) \\ &= g(\mathbf{v}) + \langle \nabla g(\mathbf{x}^{(k)}), \mathbf{x}^{(k+1)} - \mathbf{v} \rangle + \frac{L}{2} \|\mathbf{x}^{(k+1)} - \mathbf{x}^{(k)}\|_2^2 \\ &\quad + h(\mathbf{x}^{(k+1)}). \end{aligned} \quad (32)$$

When  $\text{supp}(\mathbf{v}) = \text{supp}(\mathbf{x}^{(k+1)})$ , according to (31) and (32),

$$\begin{aligned} F(\mathbf{x}^{(k+1)}) &\leq g(\mathbf{v}) + \langle \nabla g(\mathbf{x}^{(k)}), \mathbf{x}^{(k+1)} - \mathbf{v} \rangle \\ &\quad + \frac{L}{2} \|\mathbf{x}^{(k+1)} - \mathbf{x}^{(k)}\|_2^2 + h(\mathbf{x}^{(k+1)}) \\ &= g(\mathbf{v}) + \langle \nabla g(\mathbf{x}^{(k)}), \mathbf{x}^{(k+1)} - \mathbf{v} \rangle \\ &\quad + \frac{L}{2} \|\mathbf{x}^{(k+1)} - \mathbf{x}^{(k)}\|_2^2 + h(\mathbf{v}) \\ &\quad + \langle \nabla g(\mathbf{x}^{(k)}) + \frac{1}{s}(\mathbf{x}^{(k+1)} - \mathbf{x}^{(k)}), \mathbf{v} - \mathbf{x}^{(k+1)} \rangle \\ &= F(\mathbf{v}) + \frac{1}{s} \langle \mathbf{x}^{(k+1)} - \mathbf{x}^{(k)}, \mathbf{v} - \mathbf{x}^{(k+1)} \rangle \\ &\quad + \frac{L}{2} \|\mathbf{x}^{(k+1)} - \mathbf{x}^{(k)}\|_2^2 \\ &= F(\mathbf{v}) + \frac{1}{s} \langle \mathbf{x}^{(k+1)} - \mathbf{x}^{(k)}, \mathbf{v} - \mathbf{x}^{(k)} \rangle \\ &\quad - \frac{1}{s} \|\mathbf{x}^{(k+1)} - \mathbf{x}^{(k)}\|_2^2 + \frac{L}{2} \|\mathbf{x}^{(k+1)} - \mathbf{x}^{(k)}\|_2^2 \\ &= F(\mathbf{v}) + \frac{1}{s} \langle \mathbf{x}^{(k+1)} - \mathbf{x}^{(k)}, \mathbf{v} - \mathbf{x}^{(k)} \rangle \\ &\quad - \left(\frac{1}{s} - \frac{L}{2}\right) \|\mathbf{x}^{(k+1)} - \mathbf{x}^{(k)}\|_2^2 \\ &\leq F(\mathbf{v}) + \frac{1}{s} \langle \mathbf{x}^{(k+1)} - \mathbf{x}^{(k)}, \mathbf{v} - \mathbf{x}^{(k)} \rangle \\ &\quad - \frac{1}{2s} \|\mathbf{x}^{(k+1)} - \mathbf{x}^{(k)}\|_2^2. \end{aligned} \quad (33)$$

Now  $\text{supp}(\mathbf{x}^*) = \text{supp}(\mathbf{x}^{(k+1)}) = \mathbf{S}^*$ , we can let  $\mathbf{v} = \mathbf{x}^*$  in (33), leading to

$$\begin{aligned} F(\mathbf{x}^{(k+1)}) - F(\mathbf{x}^*) &\leq \frac{1}{s} \langle \mathbf{x}^{(k+1)} - \mathbf{x}^{(k)}, \mathbf{x}^* - \mathbf{x}^{(k)} \rangle - \frac{1}{2s} \|\mathbf{x}^{(k+1)} - \mathbf{x}^{(k)}\|_2^2 \\ &= \frac{1}{2s} (\|\mathbf{x}^{(k)} - \mathbf{x}^*\|_2^2 - \|\mathbf{x}^{(k+1)} - \mathbf{x}^*\|_2^2). \end{aligned} \quad (34)$$

Summing (34) over  $k = k_0, \dots, m$  with  $m \geq k_0$ ,

$$\sum_{k=k_0}^m F(\mathbf{x}^{(k+1)}) - F(\mathbf{x}^*)$$

$$\begin{aligned}
&\leq \sum_{k=k_0}^m \frac{1}{2s} (\|\mathbf{x}^{(k)} - \mathbf{x}^*\|_2^2 - \|\mathbf{x}^{(k+1)} - \mathbf{x}^*\|_2^2) \\
&= \frac{1}{2s} (\|\mathbf{x}^{(k_0)} - \mathbf{x}^*\|_2^2 - \|\mathbf{x}^{(m+1)} - \mathbf{x}^*\|_2^2). \quad (35)
\end{aligned}$$

Since  $\{F(\mathbf{x}^{(k)})\}_k$  is non-increasing, we have  $\sum_{k=k_0}^m F(\mathbf{x}^{(k+1)}) - F(\mathbf{x}^*) > (m - k_0 + 1)F(\mathbf{x}^{(m+1)}) - F(\mathbf{x}^*)$ . It follows from (35) that

$$\begin{aligned}
&F(\mathbf{x}^{(m+1)}) - F(\mathbf{x}^*) \\
&\leq \frac{1}{2s(m - k_0 + 1)} (\|\mathbf{x}^{(k_0)} - \mathbf{x}^*\|_2^2 - \|\mathbf{x}^{(m+1)} - \mathbf{x}^*\|_2^2) \\
&\leq \frac{1}{2s(m - k_0 + 1)} \|\mathbf{x}^{(k_0)} - \mathbf{x}^*\|_2^2. \quad (36)
\end{aligned}$$

Now we show that  $\mathbf{x}^*$  is a critical point of  $F(\cdot)$ . It follows from (30) that  $-\nabla g(\mathbf{x}^{(k_j-1)}) - \frac{1}{s}(\mathbf{x}^{(k_j)} - \mathbf{x}^{(k_j-1)}) \in \partial h(\mathbf{x}^{(k_j)})$  for  $k_j \geq 1$ . In addition, since  $\partial F(\mathbf{x}^{(k_j)}) = \nabla g(\mathbf{x}^{(k_j)}) + \partial h(\mathbf{x}^{(k_j)})$ , we have

$$\nabla g(\mathbf{x}^{(k_j)}) - \nabla g(\mathbf{x}^{(k_j-1)}) - \frac{1}{s}(\mathbf{x}^{(k_j)} - \mathbf{x}^{(k_j-1)}) \in \partial F(\mathbf{x}^{(k_j)}). \quad (37)$$

Due to the fact that  $\|\mathbf{x}^{(k)} - \mathbf{x}^{(k-1)}\|_2 \rightarrow 0$  as  $k \rightarrow \infty$ , when  $j \rightarrow \infty$  we have

$$\begin{aligned}
&\|\nabla g(\mathbf{x}^{(k_j)}) - \nabla g(\mathbf{x}^{(k_j-1)}) - \frac{1}{s}(\mathbf{x}^{(k_j)} - \mathbf{x}^{(k_j-1)})\|_2 \\
&\leq L\|\mathbf{x}^{(k_j)} - \mathbf{x}^{(k_j-1)}\|_2 + \frac{1}{s}\|\mathbf{x}^{(k_j)} - \mathbf{x}^{(k_j-1)}\|_2 \\
&\rightarrow 0. \quad (38)
\end{aligned}$$

Also, as  $j \rightarrow \infty$ ,

$$\begin{aligned}
&F(\mathbf{x}^{(k_j)}) = g(\mathbf{x}^{(k_j)}) + h(\mathbf{x}^{(k_j)}) = g(\mathbf{x}^{(k_j)}) + \lambda|\mathbf{S}^*| \\
&\rightarrow g(\mathbf{x}^*) + \lambda|\mathbf{S}^*| = g(\mathbf{x}^*) + h(\mathbf{x}^*) = F(\mathbf{x}^*). \quad (39)
\end{aligned}$$

Based on (37), (38) and (39),  $\mathbf{0} \in \partial F(\mathbf{x}^*)$  and  $\mathbf{x}^*$  is a critical point of  $F(\cdot)$ .

In addition,  $k_0$  is upper bounded. Note that the sequence experiences only a finite number (at most  $|\mathbf{S}|$ ) of strict support shrinkages. The iterations of PGD between two consecutive strict support shrinkages are equivalent to those of regular gradient descent on  $g$ . Suppose the last support shrinkage happens in  $k_1$ -th iteration with  $k_1 \geq 0$ , and let  $\mathbf{S}_1 = \text{supp}(\mathbf{x}^{(k_1)})$ . Let  $\mathbf{x}'$  be the solution to the problem  $\min_{\mathbf{x}, \text{supp}(\mathbf{x})=\mathbf{S}_1} g(\mathbf{x})$ . Let the  $q$ -th ( $q \in \mathbf{S}_1$ ) element of the variable incurs support shrinkage, and  $\{\mathbf{x}'^{(t)}\}$  be the sequence generated by performing gradient descent on  $g$  starting with  $\mathbf{x}^{(k_1)}$ . We can always choose  $s$  such that  $\sqrt{2\lambda s} \neq |\mathbf{x}'_q|$ . Because  $\{\mathbf{x}'^{(t)}\}$

converges to  $\mathbf{x}'$ , the support shrinkage at the  $q$ -th element of the variable must happen within finite iterations. To see this, since  $\sqrt{2\lambda s} \neq \mathbf{x}'_q$ , there exists a small  $\delta > 0$  such that  $(\mathbf{x}'_q - \delta, \mathbf{x}'_q + \delta) \subset (-\sqrt{2\lambda s}, \sqrt{2\lambda s})$  or  $(\mathbf{x}'_q - \delta, \mathbf{x}'_q + \delta) \subset [-\sqrt{2\lambda s}, \sqrt{2\lambda s}]^c$ , where  $\mathbf{A}^c$  is the complement set of  $\mathbf{A}$ . Since  $\{\mathbf{x}'^{(t)}\}$  converges to  $\mathbf{x}'$ , after  $T$  iterations  $\{\mathbf{x}'^{(t)}\}_{t>T}$  must fall in  $(\mathbf{x}'_q - \delta, \mathbf{x}'_q + \delta)$ . If  $(\mathbf{x}'_q - \delta, \mathbf{x}'_q + \delta) \subset (-\sqrt{2\lambda s}, \sqrt{2\lambda s})$ , then support shrinkage happens after  $T$  iterations. If  $(\mathbf{x}'_q - \delta, \mathbf{x}'_q + \delta) \subset [-\sqrt{2\lambda s}, \sqrt{2\lambda s}]^c$ , support shrinkage must happen within  $T$  iterations, otherwise  $|\mathbf{x}'^{(t)}| > \sqrt{2\lambda s}$  for  $t > T$  and support shrinkage never happens at the  $q$ -th element of the variable, contradicting with the given fact. Therefore, each support shrinkage happens with finite iterations. Because shrinkage can happen at most  $|\mathbf{S}|$  times,  $k_0$  is upper bounded by a finite number.  $\square$

**Lemma C.** For any two vectors  $\mathbf{u}, \mathbf{v} \in \mathbb{R}^d$ ,  $\|\mathbf{u} - \mathbf{P}_{\mathbf{R}}(\mathbf{v})\|_2 \leq \|\mathbf{u} - \mathbf{v}\|_2$  where  $\text{supp}(\mathbf{u}) \subseteq \mathbf{R}$ .

*Proof.* We have

$$\begin{aligned}
&\|\mathbf{u} - \mathbf{v}\|_2^2 \\
&= \|\mathbf{P}_{\mathbf{R}}(\mathbf{u} - \mathbf{v})\|_2^2 + \|\mathbf{P}_{\{1, \dots, d\} \setminus \mathbf{R}}(\mathbf{u} - \mathbf{v})\|_2^2 \\
&\geq \|\mathbf{P}_{\mathbf{R}}(\mathbf{u} - \mathbf{v})\|_2^2 = \|\mathbf{u} - \mathbf{P}_{\mathbf{R}}(\mathbf{v})\|_2^2. \quad (40)
\end{aligned}$$

It follows that  $\|\mathbf{u} - \mathbf{P}_{\mathbf{R}}(\mathbf{v})\|_2 \leq \|\mathbf{u} - \mathbf{v}\|_2$ .  $\square$

**Lemma 3.** (Support shrinkage for nonmonotone accelerated proximal gradient descent with support projection in Algorithm 2) *The sequence  $\{\mathbf{x}^{(k)}\}_k$  generated by Algorithm 2 satisfies*

$$\text{supp}(\mathbf{x}^{(k+1)}) \subseteq \text{supp}(\mathbf{x}^{(k)}), k \geq 1, \quad (41)$$

*namely the support of the sequence  $\{\mathbf{x}^{(k)}\}_{k=1}^\infty$  shrinks.*

**Proof of Lemma 3.** We prove this Lemma by mathematical induction, and we will prove that

$$\text{supp}(\mathbf{x}^{(\bar{k}+1)}) \subseteq \text{supp}(\mathbf{x}^{(\bar{k})}), \bar{k} \geq 1. \quad (42)$$

When  $\bar{k} = 1$ , using argument similar to the proof of Lemma 1 we can show that  $\text{supp}(\mathbf{x}^{(2)}) \subseteq \text{supp}(\mathbf{x}^{(1)})$ , i.e. the support of  $\mathbf{x}$  shrinks after the first iteration.

Now (42) are verified for  $\bar{k} = 1$ . Suppose (42) holds for all  $\bar{k} \leq k'$  with  $k' \geq 1$ . We now consider the case that  $\bar{k} = k' + 1$ .

Note the support projection operation in the update rule (4) for  $\mathbf{w}^{(k)}$ , and  $\text{supp}(\mathbf{w}^{(k'+1)}) \subseteq \text{supp}(\mathbf{x}^{(k'+1)})$ . Let  $\mathbf{q}^{(k'+1)} = -s\nabla g(\mathbf{w}^{(k'+1)})$  and  $\tilde{\mathbf{x}}_j^{(k'+2)} = \mathbf{w}^{(k'+1)} -$

$s\nabla g(\mathbf{w}^{(k'+1)})$ . Then  $\mathbf{x}_j^{(k'+2)} = 0$  due to the update rule (5) for any  $j \notin \text{supp}(\mathbf{w}^{(k'+1)})$  and

$$|\bar{\mathbf{x}}_j^{(k'+2)}| \leq \|\mathbf{q}^{(k'+1)}\|_\infty \leq sG \leq \sqrt{2\lambda s}. \quad (43)$$

Because  $s \leq \frac{2\lambda}{G^2}$ , the zero elements of  $\mathbf{w}^{(k'+1)}$  remain unchanged in  $\mathbf{x}^{(k'+2)}$ , and it follows that  $\text{supp}(\mathbf{x}^{(k'+2)}) \subseteq \text{supp}(\mathbf{w}^{(k'+1)}) \subseteq \text{supp}(\mathbf{x}^{(k'+1)})$ . Therefore, (42) holds for  $\bar{k} = k' + 1$ . It follows that (42) holds for all  $\bar{k} \geq 1$ .  $\square$

**Theorem 3.** (Convergence of Nonmonotone Accelerated Proximal Gradient Descent for the  $\ell^0$  regularization problem (1)) *Suppose  $s \leq \min\{\frac{2\lambda}{G^2}, \frac{1}{L}\}$ , and  $\mathbf{x}^*$  is a limit point of  $\{\mathbf{x}^{(k)}\}_{k=0}^\infty$  generated by Algorithm 2. There exists  $k_0 \geq 1$  such that*

$$F(\mathbf{x}^{(m+1)}) - F(\mathbf{x}^*) \leq \frac{4}{(m+1)^2} V^{(k_0)} \quad (44)$$

for all  $m \geq k_0$ , where

$$V^{(k_0)} \triangleq \left( \frac{1}{2s} \|(t_{k_0-1} - 1)\mathbf{x}^{(k_0-1)} - t_{k_0-1}\mathbf{x}^{(k_0)} + \mathbf{x}^*\|_2^2 + t_{k_0-1}^2 (F(\mathbf{x}^{(k_0)}) - F(\mathbf{x}^*)) \right). \quad (45)$$

**Proof of Theorem 3.** According to Lemma 3, there exists  $k_0 \geq 0$  such that  $\{\mathbf{x}^{(k)}\}_{k=k_0}^\infty \subseteq \mathcal{X}_T$ . It follows that  $\text{supp}(\mathbf{x}^*) = \mathbf{S}^*$ .

When  $\text{supp}(\mathbf{v}) = \text{supp}(\mathbf{x}^{(k+1)})$  for  $k \geq k_0$ , we have

$$\begin{aligned} F(\mathbf{x}^{(k+1)}) &\leq g(\mathbf{v}) + \langle \nabla g(\mathbf{w}^{(k)}), \mathbf{x}^{(k+1)} - \mathbf{v} \rangle \\ &+ \frac{L}{2} \|\mathbf{x}^{(k+1)} - \mathbf{w}^{(k)}\|_2^2 + h(\mathbf{x}^{(k+1)}) \\ &= g(\mathbf{v}) + \langle \nabla g(\mathbf{w}^{(k)}), \mathbf{x}^{(k+1)} - \mathbf{v} \rangle \\ &+ \frac{L}{2} \|\mathbf{x}^{(k+1)} - \mathbf{w}^{(k)}\|_2^2 + h(\mathbf{v}) \\ &+ \langle \nabla g(\mathbf{w}^{(k)}) + \frac{1}{s}(\mathbf{x}^{(k+1)} - \mathbf{w}^{(k)}), \mathbf{v} - \mathbf{x}^{(k+1)} \rangle \\ &= F(\mathbf{v}) + \frac{1}{s} \langle \mathbf{x}^{(k+1)} - \mathbf{w}^{(k)}, \mathbf{v} - \mathbf{x}^{(k+1)} \rangle \\ &+ \frac{L}{2} \|\mathbf{x}^{(k+1)} - \mathbf{w}^{(k)}\|_2^2 \\ &\leq F(\mathbf{v}) + \frac{1}{s} \langle \mathbf{x}^{(k+1)} - \mathbf{w}^{(k)}, \mathbf{v} - \mathbf{w}^{(k)} \rangle \\ &- \frac{1}{s} \|\mathbf{x}^{(k+1)} - \mathbf{w}^{(k)}\|_2^2 + \frac{L}{2} \|\mathbf{x}^{(k+1)} - \mathbf{w}^{(k)}\|_2^2 \\ &= F(\mathbf{v}) + \frac{1}{s} \langle \mathbf{x}^{(k+1)} - \mathbf{w}^{(k)}, \mathbf{v} - \mathbf{w}^{(k)} \rangle \\ &- \left( \frac{1}{s} - \frac{L}{2} \right) \|\mathbf{x}^{(k+1)} - \mathbf{w}^{(k)}\|_2^2. \end{aligned} \quad (46)$$

Now using similar arguments in the proof of Lemma 3, let  $\mathbf{v} = \mathbf{x}^{(k)}$  and  $\mathbf{v} = \mathbf{x}^*$  in in (46), we have

$$F(\mathbf{x}^{(k+1)}) \leq F(\mathbf{x}^{(k)}) + \frac{1}{s} \langle \mathbf{x}^{(k+1)} - \mathbf{w}^{(k)},$$

$$\mathbf{x}^{(k)} - \mathbf{w}^{(k)} \rangle - \left( \frac{1}{s} - \frac{L}{2} \right) \|\mathbf{x}^{(k+1)} - \mathbf{w}^{(k)}\|_2^2, \quad (47)$$

and

$$\begin{aligned} F(\mathbf{x}^{(k+1)}) &\leq F(\mathbf{x}^*) + \frac{1}{s} \langle \mathbf{x}^{(k+1)} - \mathbf{w}^{(k)}, \\ \mathbf{x}^* - \mathbf{w}^{(k)} \rangle - \left( \frac{1}{s} - \frac{L}{2} \right) \|\mathbf{x}^{(k+1)} - \mathbf{w}^{(k)}\|_2^2. \end{aligned} \quad (48)$$

(47)  $\times$   $(t_k - 1)$  + (48), we have

$$\begin{aligned} &t_k F(\mathbf{x}^{(k+1)}) - (t_k - 1)F(\mathbf{x}^{(k)}) - F(\mathbf{x}^*) \\ &\leq \frac{1}{s} \langle \mathbf{x}^{(k+1)} - \mathbf{w}^{(k)}, (t_k - 1)(\mathbf{x}^{(k)} - \mathbf{w}^{(k)}) + \mathbf{x}^* - \mathbf{w}^{(k)} \rangle \\ &- t_k \left( \frac{1}{s} - \frac{L}{2} \right) \|\mathbf{x}^{(k+1)} - \mathbf{w}^{(k)}\|_2^2. \end{aligned} \quad (49)$$

Multiplying both sides of (49) by  $t_k$ , since  $t_k^2 - t_k = t_{k-1}^2$ , we have

$$\begin{aligned} &t_k^2 (F(\mathbf{x}^{(k+1)}) - F(\mathbf{x}^*)) - t_{k-1}^2 (F(\mathbf{x}^{(k)}) - F(\mathbf{x}^*)) \\ &\leq \frac{1}{s} \langle t_k(\mathbf{x}^{(k+1)} - \mathbf{w}^{(k)}), (t_k - 1)(\mathbf{x}^{(k)} - \mathbf{w}^{(k)}) + \\ &\mathbf{x}^* - \mathbf{w}^{(k)} \rangle - \left( \frac{1}{s} - \frac{L}{2} \right) \|t_k(\mathbf{x}^{(k+1)} - \mathbf{w}^{(k)})\|_2^2 \\ &\leq \frac{1}{s} \langle t_k(\mathbf{x}^{(k+1)} - \mathbf{w}^{(k)}), (t_k - 1)(\mathbf{x}^{(k)} - \mathbf{w}^{(k)}) \\ &+ \mathbf{x}^* - \mathbf{w}^{(k)} \rangle - \frac{1}{2s} \|t_k(\mathbf{x}^{(k+1)} - \mathbf{w}^{(k)})\|_2^2 \\ &= \frac{1}{2s} (\|(t_k - 1)\mathbf{x}^{(k)} - t_k\mathbf{w}^{(k)} + \mathbf{x}^*\|_2^2 \\ &- \|(t_k - 1)\mathbf{x}^{(k)} - t_k\mathbf{x}^{(k+1)} + \mathbf{x}^*\|_2^2). \end{aligned} \quad (50)$$

Since  $\mathbf{w}^{(k)} = \mathbf{P}_{\text{supp}(\mathbf{x}^{(k)})}(\mathbf{u}^{(k)})$ , it follows that  $(t_k - 1)\mathbf{x}^{(k)} - t_k\mathbf{P}_{\text{supp}(\mathbf{x}^{(k)})}(\mathbf{u}^{(k)}) + \mathbf{x}^* = (t_k - 1)\mathbf{x}^{(k)} - t_k\mathbf{w}^{(k)} + \mathbf{x}^*$ . By Lemma C and (50), we have

$$\begin{aligned} &t_k^2 (F(\mathbf{x}^{(k+1)}) - F(\mathbf{x}^*)) - t_{k-1}^2 (F(\mathbf{x}^{(k)}) - F(\mathbf{x}^*)) \\ &\leq \frac{1}{2s} (\|(t_k - 1)\mathbf{x}^{(k)} - t_k\mathbf{u}^{(k)} + \mathbf{x}^*\|_2^2 \\ &- \|(t_k - 1)\mathbf{x}^{(k)} - t_k\mathbf{x}^{(k+1)} + \mathbf{x}^*\|_2^2). \end{aligned} \quad (51)$$

Define  $\mathbf{U}^{(k+1)} = (t_k - 1)\mathbf{x}^{(k)} - t_k\mathbf{x}^{(k+1)} + \mathbf{x}^*$ , then  $\mathbf{U}^{(k)} = (t_{k-1} - 1)\mathbf{x}^{(k-1)} - t_{k-1}\mathbf{x}^{(k)} + \mathbf{x}^*$ . It can be verified that  $\mathbf{U}^{(k)} = (t_k - 1)\mathbf{x}^{(k)} - t_k\mathbf{u}^{(k)} + \mathbf{x}^*$  according to the update rule (3) for  $\mathbf{u}^{(k)}$ . Then according to (51), we have

$$\begin{aligned} &t_k^2 (F(\mathbf{x}^{(k+1)}) - F(\mathbf{x}^*)) - t_{k-1}^2 (F(\mathbf{x}^{(k)}) - F(\mathbf{x}^*)) \\ &\leq \frac{1}{2s} (\|\mathbf{U}^{(k)}\|_2^2 - \|\mathbf{U}^{(k+1)}\|_2^2). \end{aligned} \quad (52)$$

Summing (52) over  $k = k_0, k_0 + 1, \dots, m$  for  $m \geq k_0$ , we have

$$t_m^2 (F(\mathbf{x}^{(m+1)}) - F(\mathbf{x}^*)) - t_{k_0-1}^2 (F(\mathbf{x}^{(k_0)}) - F(\mathbf{x}^*))$$

$$\begin{aligned}
&\leq \frac{1}{2s} (\|\mathbf{U}^{(k_0)}\|_2^2 - \|\mathbf{U}^{(m+1)}\|_2^2) \\
&\leq \frac{1}{2s} \|\mathbf{U}^{(k_0)}\|_2^2 \\
&= \frac{1}{2s} \|(t_{k_0-1} - 1)\mathbf{x}^{(k_0-1)} - t_{k_0-1}\mathbf{x}^{(k_0)} + \mathbf{x}^*\|_2^2. \quad (53)
\end{aligned}$$

It follows from (53) that

$$\begin{aligned}
&F(\mathbf{x}^{(m+1)}) - F(\mathbf{x}^*) \\
&\leq \frac{1}{2st_m^2} \|(t_{k_0-1} - 1)\mathbf{x}^{(k_0-1)} - t_{k_0-1}\mathbf{x}^{(k_0)} + \mathbf{x}^*\|_2^2 \\
&+ \frac{t_{k_0-1}^2}{t_m^2} (F(\mathbf{x}^{(k_0)}) - F(\mathbf{x}^*)) \\
&< \frac{1}{t_m^2} \left( \frac{1}{2s} \|(t_{k_0-1} - 1)\mathbf{x}^{(k_0-1)} - t_{k_0-1}\mathbf{x}^{(k_0)} + \mathbf{x}^*\|_2^2 \right. \\
&+ \left. t_{k_0-1}^2 (F(\mathbf{x}^{(k_0)}) - F(\mathbf{x}^*)) \right) \\
&\leq \frac{4}{(m+1)^2} \left( \frac{1}{2s} \|(t_{k_0-1} - 1)\mathbf{x}^{(k_0-1)} - t_{k_0-1}\mathbf{x}^{(k_0)} + \mathbf{x}^*\|_2^2 \right. \\
&+ \left. t_{k_0-1}^2 (F(\mathbf{x}^{(k_0)}) - F(\mathbf{x}^*)) \right) \\
&\triangleq \frac{4}{(m+1)^2} W^{(k_0)}, \quad (54)
\end{aligned}$$

where the last inequality is due to the fact that  $t_k \geq \frac{k+1}{2}$  for  $k \geq 1$ .  $\square$

**Lemma 4.** (Support shrinkage for accelerated proximal gradient descent with support projection in Algorithm 3) *The sequence  $\{\mathbf{z}^{(k)}\}_{k=1}^\infty$  and  $\{\mathbf{x}^{(k)}\}_{k=1}^\infty$  generated by Algorithm 3 satisfy*

$$\text{supp}(\mathbf{z}^{(k+1)}) \subseteq \text{supp}(\mathbf{z}^{(k)}), \quad (55)$$

$$\text{supp}(\mathbf{x}^{(k+1)}) \subseteq \text{supp}(\mathbf{x}^{(k)}), \quad (56)$$

*namely the support of both sequences shrinks.*

**Proof of Lemma 4.** We prove this Lemma by mathematical induction, and we will prove that for all  $\bar{k} \geq 1$ ,

$$\text{supp}(\mathbf{z}^{(\bar{k}+1)}) \subseteq \text{supp}(\mathbf{z}^{(\bar{k})}). \quad (57)$$

When  $\bar{k} = 1$ , we first show that  $\text{supp}(\mathbf{z}^{(2)}) \subseteq \text{supp}(\mathbf{z}^{(1)})$ , i.e. the support of  $\mathbf{z}^{(k)}$  shrinks after the first iteration.

It is now verified that (57) hold for  $\bar{k} = 1$ . Suppose (57) holds for all  $\bar{k} \leq k'$  with  $k' \geq 1$ . We now consider the case that  $\bar{k} = k' + 1$ .

Let  $\mathbf{q}^{(k'+1)} = -s\nabla g(\mathbf{w}^{(k'+1)})$  and  $\tilde{\mathbf{x}}_j^{(k'+2)} = \mathbf{w}^{(k'+1)} - s\nabla g(\mathbf{w}^{(k'+1)})$ . Then  $\mathbf{x}_j^{(k'+2)} = 0$  due to the update rule (9) for any  $j \notin \text{supp}(\mathbf{w}^{(k'+1)})$  and

$$|\tilde{\mathbf{x}}_j^{(k'+2)}| \leq sG \leq \sqrt{2\lambda}s. \quad (58)$$

Because  $s \leq \frac{2\lambda}{G^2}$ , the zero elements of  $\mathbf{w}^{(k'+1)}$  remain unchanged in  $\mathbf{z}^{(k'+2)}$ . According to the support projection operation in (8),  $\text{supp}(\mathbf{w}^{(k'+1)}) \subseteq \text{supp}(\mathbf{z}^{(k'+1)}) = \mathbf{S}'$ . It follows that  $\text{supp}(\mathbf{z}^{(k'+2)}) \subseteq \text{supp}(\mathbf{w}^{(k'+1)}) \subseteq \text{supp}(\mathbf{z}^{(k'+1)})$ . Therefore, (57) holds for  $\bar{k} = k' + 1$ . It follows that (57) holds for all  $\bar{k} \geq 1$ .

Now we prove (56), i.e. that for all  $k \geq 1$ ,  $\text{supp}(\mathbf{x}^{(k+1)}) \subseteq \text{supp}(\mathbf{x}^{(k)})$ .

We have already shown that for all  $k \geq 1$ ,  $\text{supp}(\mathbf{x}^{(k)}) = \text{supp}(\mathbf{z}^{(\bar{k})})$  for some  $\bar{k} \leq k$ . Note that  $\mathbf{x}^{(k+1)} = \mathbf{z}^{(k+1)}$  or  $\mathbf{x}^{(k+1)} = \mathbf{x}^{(k)}$ . In the latter case, we trivially have  $\text{supp}(\mathbf{x}^{(k+1)}) = \text{supp}(\mathbf{x}^{(k)})$ . In the former case,  $\text{supp}(\mathbf{x}^{(k+1)}) = \text{supp}(\mathbf{z}^{(k+1)}) \subseteq \text{supp}(\mathbf{z}^{(\bar{k})}) = \text{supp}(\mathbf{x}^{(k)})$  because  $\bar{k} \leq k < k+1$ . Therefore, (56) holds for all  $k \geq 1$ .  $\square$

**Theorem 4.** (Convergence of Monotone Accelerated Proximal Gradient Descent for the  $\ell^0$  regularization problem (1)) *Suppose  $s \leq \min\{\frac{2\lambda}{G^2}, \frac{1}{L}\}$ , and  $\mathbf{x}^*$  is a limit point of  $\{\mathbf{x}^{(k)}\}_{k=0}^\infty$  generated by Algorithm 3. There exists  $k_0 \geq 1$  such that*

$$F(\mathbf{x}^{(m+1)}) - F(\mathbf{x}^*) \leq \frac{4}{(m+1)^2} W^{(k_0)} \quad (59)$$

for all  $m \geq k_0$ , where

$$\begin{aligned}
W^{(k_0)} &\triangleq \left( \frac{1}{2s} \|(t_{k_0-1} - 1)\mathbf{x}^{(k_0-1)} - t_{k_0-1}\mathbf{z}^{(k_0)} + \mathbf{x}^*\|_2^2 \right. \\
&+ \left. t_{k_0-1}^2 (F(\mathbf{x}^{(k_0)}) - F(\mathbf{x}^*)) \right). \quad (60)
\end{aligned}$$

**Proof of Theorem 4.** According to Lemma 4, it can be verified that  $\{\mathbf{x}^{(k)}\}_{k=0}^\infty$  forms at most  $T_1 \leq |\mathbf{S}| + 1$  subsequences with shrinking support  $\{\mathcal{X}_t\}_{t=1}^{T_1}$ , and  $\{\mathbf{z}^{(k)}\}_{k=0}^\infty$  also forms at most  $T_2 \leq |\mathbf{S}| + 1$  subsequences with shrinking support, denoted by  $\{\mathcal{Z}_t\}_{t=1}^{T_2}$ .

Based on Lemma 2, there exists  $k_1 \geq 0$  such that  $\{\mathbf{x}^{(k)}\}_{k=k_1}^\infty \subseteq \mathcal{X}_{T_1}$ . Similarly, there exists  $k_2 \geq 0$  such that  $\{\mathbf{z}^{(k)}\}_{k=k_2}^\infty \subseteq \mathcal{Z}_{T_2}$ . According to Lemma 2, Let all the elements of  $\mathcal{X}_{T_1}$  have support  $\mathbf{S}_1$ , and all the elements of  $\mathcal{Z}_{T_2}$  have support  $\mathbf{S}_2$ . We will show that  $\mathbf{S}_1 = \mathbf{S}_2$ . To see this, let  $k_0 = \max\{k_1, k_2\}$ , then there exists  $k' \geq k_0$  such that  $\mathbf{x}^{(k')} = \mathbf{z}^{(k')}$ . Due to the fact that  $\{\mathbf{x}^{(k)}\}_{k=k_1}^\infty \subseteq \mathcal{X}_{T_1}$  and  $\{\mathbf{z}^{(k)}\}_{k=k_2}^\infty \subseteq \mathcal{Z}_{T_2}$ ,  $\mathbf{S}_1 = \text{supp}(\mathbf{x}^{(k')}) = \text{supp}(\mathbf{z}^{(k')}) = \mathbf{S}_2$ .

Let  $\mathbf{S}_1 = \mathbf{S}_2 = \mathbf{S}^*$ , then all the elements of  $\{\mathbf{x}^{(k)}\}_{k=k_0}^\infty$  and  $\{\mathbf{z}^{(k)}\}_{k=k_0}^\infty$  have the same support  $\mathbf{S}^*$ . It follows that  $\text{supp}(\mathbf{x}^*) = \mathbf{S}^*$ .

When  $\text{supp}(\mathbf{v}) = \text{supp}(\mathbf{z}^{(k+1)})$  with  $k \geq k_0$ , we have

$$\begin{aligned}
F(\mathbf{z}^{(k+1)}) &\leq g(\mathbf{v}) + \langle \nabla g(\mathbf{w}^{(k)}), \mathbf{z}^{(k+1)} - \mathbf{v} \rangle \\
&+ \frac{L\mathbf{S}'}{2} \|\mathbf{z}^{(k+1)} - \mathbf{w}^{(k)}\|_2^2 + h(\mathbf{z}^{(k+1)})
\end{aligned}$$

$$\begin{aligned}
&= g(\mathbf{v}) + \langle \nabla g(\mathbf{w}^{(k)}), \mathbf{z}^{(k+1)} - \mathbf{v} \rangle \\
&+ \frac{L\mathbf{S}'}{2} \|\mathbf{z}^{(k+1)} - \mathbf{w}^{(k)}\|_2^2 + h(\mathbf{v}) \\
&+ \langle \nabla g(\mathbf{w}^{(k)}) + \frac{1}{s}(\mathbf{z}^{(k+1)} - \mathbf{w}^{(k)}), \mathbf{v} - \mathbf{z}^{(k+1)} \rangle \\
&= F(\mathbf{v}) + \frac{1}{s} \langle \mathbf{z}^{(k+1)} - \mathbf{w}^{(k)}, \mathbf{v} - \mathbf{z}^{(k+1)} \rangle \\
&+ \frac{L\mathbf{S}'}{2} \|\mathbf{z}^{(k+1)} - \mathbf{w}^{(k)}\|_2^2 \\
&\leq F(\mathbf{v}) + \frac{1}{s} \langle \mathbf{z}^{(k+1)} - \mathbf{w}^{(k)}, \mathbf{v} - \mathbf{w}^{(k)} \rangle \\
&- \frac{1}{s} \|\mathbf{z}^{(k+1)} - \mathbf{w}^{(k)}\|_2^2 + \frac{L\mathbf{S}'}{2} \|\mathbf{z}^{(k+1)} - \mathbf{w}^{(k)}\|_2^2 \\
&= F(\mathbf{v}) + \frac{1}{s} \langle \mathbf{z}^{(k+1)} - \mathbf{w}^{(k)}, \mathbf{v} - \mathbf{w}^{(k)} \rangle \\
&- \left( \frac{1}{s} - \frac{L\mathbf{S}'}{2} \right) \|\mathbf{z}^{(k+1)} - \mathbf{w}^{(k)}\|_2^2. \tag{61}
\end{aligned}$$

Note that  $\text{supp}(\mathbf{x}^{(k)}) = \text{supp}(\mathbf{x}^*) = \mathbf{S}^*$  for  $k \geq k_0$ . Using similar arguments in the proof of Lemma 3, let  $\mathbf{v} = \mathbf{x}^{(k)}$  and  $\mathbf{v} = \mathbf{x}^*$  in (61) in the proof of Lemma 4, we have

$$\begin{aligned}
F(\mathbf{z}^{(k+1)}) &\leq F(\mathbf{x}^{(k)}) + \frac{1}{s} \langle \mathbf{z}^{(k+1)} - \mathbf{w}^{(k)}, \mathbf{x}^{(k)} - \mathbf{w}^{(k)} \rangle \\
&- \left( \frac{1}{s} - \frac{L}{2} \right) \|\mathbf{z}^{(k+1)} - \mathbf{w}^{(k)}\|_2^2, \tag{62}
\end{aligned}$$

and

$$\begin{aligned}
F(\mathbf{z}^{(k+1)}) &\leq F(\mathbf{x}^*) + \frac{1}{s} \langle \mathbf{z}^{(k+1)} - \mathbf{w}^{(k)}, \mathbf{x}^* - \mathbf{w}^{(k)} \rangle \\
&- \left( \frac{1}{s} - \frac{L}{2} \right) \|\mathbf{z}^{(k+1)} - \mathbf{w}^{(k)}\|_2^2. \tag{63}
\end{aligned}$$

(62)  $\times (t_k - 1)$  + (63), we have

$$\begin{aligned}
&t_k F(\mathbf{z}^{(k+1)}) - (t_k - 1)F(\mathbf{x}^{(k)}) - F(\mathbf{x}^*) \\
&\leq \frac{1}{s} \langle \mathbf{z}^{(k+1)} - \mathbf{w}^{(k)}, (t_k - 1)(\mathbf{x}^{(k)} - \mathbf{w}^{(k)}) + \mathbf{x}^* - \mathbf{w}^{(k)} \rangle \\
&- t_k \left( \frac{1}{s} - \frac{L}{2} \right) \|\mathbf{z}^{(k+1)} - \mathbf{w}^{(k)}\|_2^2. \tag{64}
\end{aligned}$$

It follows that

$$\begin{aligned}
&t_k (F(\mathbf{z}^{(k+1)}) - F(\mathbf{x}^*)) - (t_k - 1)(F(\mathbf{x}^{(k)}) - F(\mathbf{x}^*)) \\
&\leq \frac{1}{s} \langle \mathbf{z}^{(k+1)} - \mathbf{w}^{(k)}, (t_k - 1)(\mathbf{x}^{(k)} - \mathbf{w}^{(k)}) + \mathbf{x}^* - \mathbf{w}^{(k)} \rangle \\
&- t_k \left( \frac{1}{s} - \frac{L}{2} \right) \|\mathbf{z}^{(k+1)} - \mathbf{w}^{(k)}\|_2^2. \tag{65}
\end{aligned}$$

Multiplying both sides of (65) by  $t_k$ , since  $t_k^2 - t_k = t_{k-1}^2$ , we have

$$\begin{aligned}
&t_k^2 (F(\mathbf{z}^{(k+1)}) - F(\mathbf{x}^*)) - t_{k-1}^2 (F(\mathbf{x}^{(k)}) - F(\mathbf{x}^*)) \\
&\leq \frac{1}{s} \langle t_k(\mathbf{z}^{(k+1)} - \mathbf{w}^{(k)}), (t_k - 1)(\mathbf{x}^{(k)} - \mathbf{w}^{(k)}) + \mathbf{x}^* - \mathbf{w}^{(k)} \rangle \\
&- \left( \frac{1}{s} - \frac{L}{2} \right) t_k \|\mathbf{z}^{(k+1)} - \mathbf{w}^{(k)}\|_2^2
\end{aligned}$$

$$\begin{aligned}
&\leq \frac{1}{s} \langle t_k(\mathbf{z}^{(k+1)} - \mathbf{w}^{(k)}), (t_k - 1)(\mathbf{x}^{(k)} - \mathbf{w}^{(k)}) + \mathbf{x}^* - \mathbf{w}^{(k)} \rangle \\
&- \frac{1}{2s} \|t_k(\mathbf{z}^{(k+1)} - \mathbf{w}^{(k)})\|_2^2 \\
&= \frac{1}{2s} (\|(t_k - 1)\mathbf{x}^{(k)} - t_k\mathbf{w}^{(k)} + \mathbf{x}^*\|_2^2 \\
&- \|(t_k - 1)\mathbf{x}^{(k)} - t_k\mathbf{z}^{(k+1)} + \mathbf{x}^*\|_2^2). \tag{66}
\end{aligned}$$

Note that  $\text{supp}((t_k - 1)\mathbf{x}^{(k)} + \mathbf{x}^*) \subseteq \mathbf{S}^*$  and  $(\mathbf{w}^{(k)}) = \mathbf{P}_{\mathbf{S}^*}(\mathbf{u}^{(k)})$ , according to Lemma C and (66), we have

$$\begin{aligned}
&t_k^2 (F(\mathbf{z}^{(k+1)}) - F(\mathbf{x}^*)) - t_{k-1}^2 (F(\mathbf{x}^{(k)}) - F(\mathbf{x}^*)) \\
&\leq \frac{1}{2s} (\|(t_k - 1)\mathbf{x}^{(k)} - t_k\mathbf{u}^{(k)} + \mathbf{x}^*\|_2^2 \\
&- \|(t_k - 1)\mathbf{x}^{(k)} - t_k\mathbf{z}^{(k+1)} + \mathbf{x}^*\|_2^2). \tag{67}
\end{aligned}$$

Define  $\mathbf{A}^{(k+1)} = (t_k - 1)\mathbf{x}^{(k)} - t_k\mathbf{z}^{(k+1)} + \mathbf{x}^*$ , then  $\mathbf{A}^{(k)} = (t_{k-1} - 1)\mathbf{x}^{(k-1)} - t_{k-1}\mathbf{z}^{(k)} + \mathbf{x}^*$ . It can be verified that  $\mathbf{A}^{(k)} = (t_k - 1)\mathbf{x}^{(k)} - t_k\mathbf{u}^{(k)} + \mathbf{x}^*$ . Therefore,

$$\begin{aligned}
&t_k^2 (F(\mathbf{z}^{(k+1)}) - F(\mathbf{x}^*)) - t_{k-1}^2 (F(\mathbf{x}^{(k)}) - F(\mathbf{x}^*)) \\
&\leq \frac{1}{2s} (\|\mathbf{A}^{(k)}\|_2^2 - \|\mathbf{A}^{(k+1)}\|_2^2). \tag{68}
\end{aligned}$$

Summing (68) over  $k = k_0, \dots, m$  for  $m \geq k_0$ , we have

$$\begin{aligned}
&t_m^2 (F(\mathbf{z}^{(m+1)}) - F(\mathbf{x}^*)) - t_{k_0-1}^2 (F(\mathbf{x}^{(k_0)}) - F(\mathbf{x}^*)) \\
&\leq \frac{1}{2s} (\|\mathbf{A}^{(k_0)}\|_2^2 - \|\mathbf{A}^{(m+1)}\|_2^2) \leq \frac{1}{2s} \|\mathbf{A}^{(k_0)}\|_2^2 \\
&= \frac{1}{2s} \|(t_{k_0-1} - 1)\mathbf{x}^{(k_0-1)} - t_{k_0-1}\mathbf{z}^{(k_0)} + \mathbf{x}^*\|_2^2. \tag{69}
\end{aligned}$$

Since  $t_k \geq \frac{k+1}{2}$  for  $k \geq 1$ , it follows from (69) that

$$\begin{aligned}
&F(\mathbf{z}^{(m+1)}) - F(\mathbf{x}^*) \\
&\leq \frac{4}{(m+1)^2} \left( \frac{1}{2s} \|(t_{k_0-1} - 1)\mathbf{x}^{(k_0-1)} - t_{k_0-1}\mathbf{z}^{(k_0)} + \mathbf{x}^*\|_2^2 \right. \\
&\left. + t_{k_0-1}^2 (F(\mathbf{x}^{(k_0)}) - F(\mathbf{x}^*)) \right) \\
&\triangleq \frac{4}{(m+1)^2} W^{(k_0)}. \tag{70}
\end{aligned}$$

□

## References

- K. Davidson and S. Szarek. Local operator theory, random matrices and Banach spaces. In Lindenstrauss, editor, *Handbook on the Geometry of Banach spaces*, volume 1, pages 317–366. Elsevier Science, 2001.
- B. Laurent and P. Massart. Adaptive estimation of a quadratic functional by model selection. *Ann. Statist.*, 28(5):1302–1338, 10 2000.
